# Supplementary material for: Optimising diagnosis and treatment of tuberculosis infection in community and primary care settings in two urban provinces of Viet Nam: a cohort study
Source: PubMed Central journal article supplement — BMJ Open. 2023 Feb 9;13(2):e071537. doi: 10.1136/bmjopen-2022-071537 (PMC9923314; doi:10.1136/bmjopen-2022-071537), 2023-02-09
Supplement: bmjopen-2022-071537supp002.pdf [file bmjopen-2022-071537supp002.pdf]

## SUPPLEMENTAL MATERIAL

### Model specification validation results

**Figure S1: Kaplan-Meier observed survival curve of TPT regimen**

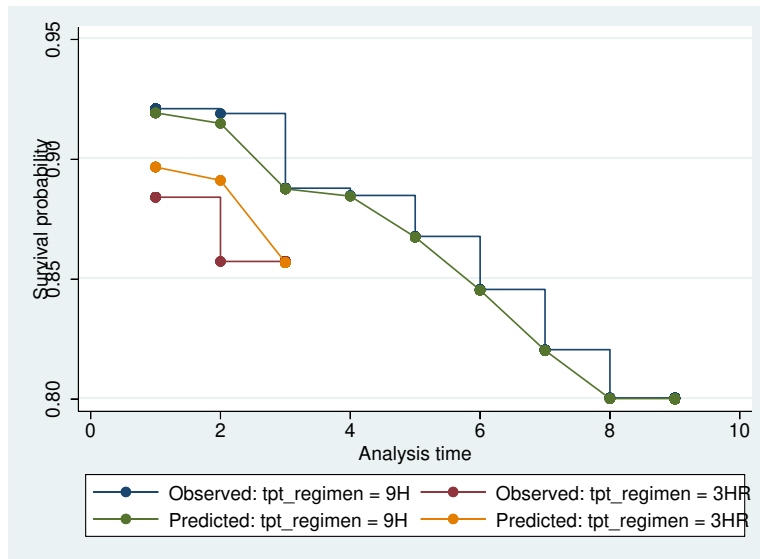

**Figure S2: Log-log plot of the final Cox model**

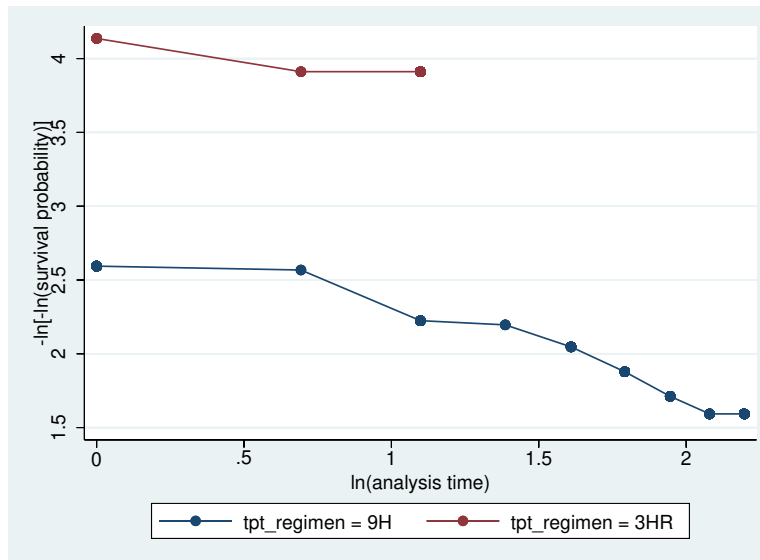

The log-rank test result to assess the equality of survival between the two TPT regimen was  $p=0.319$ .

The p-value of the global postestimation proportional hazards test 0.644 and tests of individual parameters produced p-values of  $0.112 < p < 0.955$ .
